# Supplementary material
Source: Research Square preprint supplement (doi:10.21203/rs.3.rs-9434215/v1)
Supplement: Supplementary file 1 [file 46325fc3954e3a07a28bc2ae.doc]

# Tables and Figures

**Table 1 Primer sequences used for quantitative real-time PCR**

| **Gene** | **Primer sequence (5′→3′)** | **Product size (bp)** | **Accession number** | **Amplification efficiency (%)** | **Standard curve R²** | **Slope** |
| --- | --- | --- | --- | --- | --- | --- |
| *sod* | F:CACTTCAACCCTCACGGCAT | 142 | MW362521.1 | 98.2 | 0.996 | -3.36 |
|  | R:CCTTGTTTCCCGTTGCTGAC |  |  |  |  |  |
| *cat* | F:GCAAGGTCTTTACCGAGGCT | 158 | MW362522.1 | 95.6 | 0.994 | -3.43 |
|  | R:TGACACCTTCAGCACGTGAG |  |  |  |  |  |
| *gpx* | F:AGCCCAAGTTCGTGCAGAAT | 136 | MW362523.1 | 97.3 | 0.993 | -3.39 |
|  | R:GATGTCGATGTCGATGTCGG |  |  |  |  |  |
| *nkaα1* | F:GCTGCGTGTTCTTCATCGTC | 167 | MW362524.1 | 94.8 | 0.992 | -3.46 |
|  | R:CACCAGCAGTGAGTTCACCA |  |  |  |  |  |
| *Hsp70* | F:ACGCCGACAAGTCCAAGAAG | 151 | MW362525.1 | 101.2 | 0.997 | -3.29 |
|  | R:CACCACCCTGTCGTTGTTGA |  |  |  |  |  |
| *il-1β* | F:GCTGACTTCAAGGACGGAGA | 163 | MW362526.1 | 96.7 | 0.995 | -3.41 |
|  | R:GTCACTGCCGTTGTTGGTTC |  |  |  |  |  |
| tnf-α | F:CTTCCCTCTTCACGCAGCAG | 145 | MW362527.1 | 99.5 | 0.996 | -3.34 |
|  | R:GGCATGGGACAGAGATGAGG |  |  |  |  |  |
| *bax* | F:GCTGGACATTGGACTTCCTC | 139 | MW362528.1 | 95.2 | 0.993 | -3.45 |
|  | R:GGGTAGGAGGCAGGAGTGAT |  |  |  |  |  |
| *bcl-2* | F:CTGCGTGGGAAGCGTAAAGA | 128 | MW362529.1 | 97.8 | 0.994 | -3.38 |
|  | R:ACAGTTCCACAAAGGCATCC |  |  |  |  |  |
| *actb* | F:GAGAGGTTCCGTTGCCCAGA | 152 | AY531430.1 | 100.3 | 0.998 | -3.31 |
|  | R:AGCCACCAATCCACACAGAG |  |  |  |  |  |

**Table 2 Mortality of bighead carp exposed to different SDBS concentrations for 96 hours**

| Concentration (mg/L) | Number of fish (n) | Cumulative mortality (%) | --- | --- | --- |
| --- | --- | --- | --- | --- | --- |
|  |  | 24 h | 48 h | 72 h | 96 h |
| 0 (Control) | 30 | 0 | 0 | 0 | 0 |
| 4.0 | 30 | 0 | 0 | 3.3±0.25 | 6.7±0.25 |
| 6.0 | 30 | 0 | 6.7±0.26 | 13.3±0.36 | 20.0±0.31 |
| 8.0 | 30 | 3.3±0.24 | 13.3±0.33 | 23.3±0.39 | 33.3±0.38 |
| 10.0 | 30 | 10.1±0.35 | 23.3±0.41 | 40.2±0.43 | 56.7±0.49 |
| 12.0 | 30 | 20.3±0.37 | 40.0±0.45 | 63.3±0.51 | 80.0±0.56 |

**Table 3 Median lethal concentration (LC₅₀) of SDBS for bighead carp at**

**different exposure times**

| Exposure time | LC₅₀ (mg/L) | 95% Confidence interval (mg/L)  Lower Upper | |
| --- | --- | --- | --- |
| 24 h | 17.50 | 14.86 | 20.15 |
| 48 h | 14.10 | 11.81 | 14.64 |
| 72 h | 10.86 | 9.55 | 12.07 |
| 96 h | 9.43 | 8.68 | 10.31 |

**Table4 Pearson correlation matrix for histopathological and biochemical parameters (n = 180). *** *p* < 0.001**

| Parameter | HPI | MDA | SOD | CAT | GPx | Na⁺/K⁺‑ATPase |
| --- | --- | --- | --- | --- | --- | --- |
| HPI | 1.000 |  |  |  |  |  |
| MDA | 0.892*** | 1.000 |  |  |  |  |
| SOD | −0.845*** | −0.834*** | 1.000 |  |  |  |
| CAT | −0.821*** | −0.809*** | 0.896*** | 1.000 |  |  |
| GPx | −0.798*** | −0.776*** | 0.873*** | 0.882*** | 1.000 |  |
| Na⁺/K⁺‑ATPase | −0.863*** | −0.851*** | 0.884*** | 0.851*** | 0.845*** | 1.000 |

**Table 5 Pearson correlation matrix for gene expression and phenotypic parameters (n=180)**

| Parameter | *sod*mRNA | *cat*  mRNA | *gpx*  mRNA | *nkaα1*  mRNA | *hsp70* mRNA | *il-1β* mRNA | *tnf-α* mRNA | *bax/bcl-2*  ratio |
| --- | --- | --- | --- | --- | --- | --- | --- | --- |
| SOD  activity | 0.874*** | - | - | - | - | - | - | - |
| CAT activity | - | 0.856*** | - | - | - | - | - | - |
| GPx activity | - | - | 0.821*** | - | - | - | - | - |
| NKAactivity | - | - | - | 0.856*** | - | - | - | - |
| MDA  content | -0.831*** | -0.808*** | -0.779*** | -0.839*** | 0.873*** | 0.845*** | 0.822*** | 0.861*** |
| HPI | -0.848*** | -0.826*** | -0.801*** | -0.858*** | 0.851*** | 0.842*** | 0.819*** | 0.868*** |

****
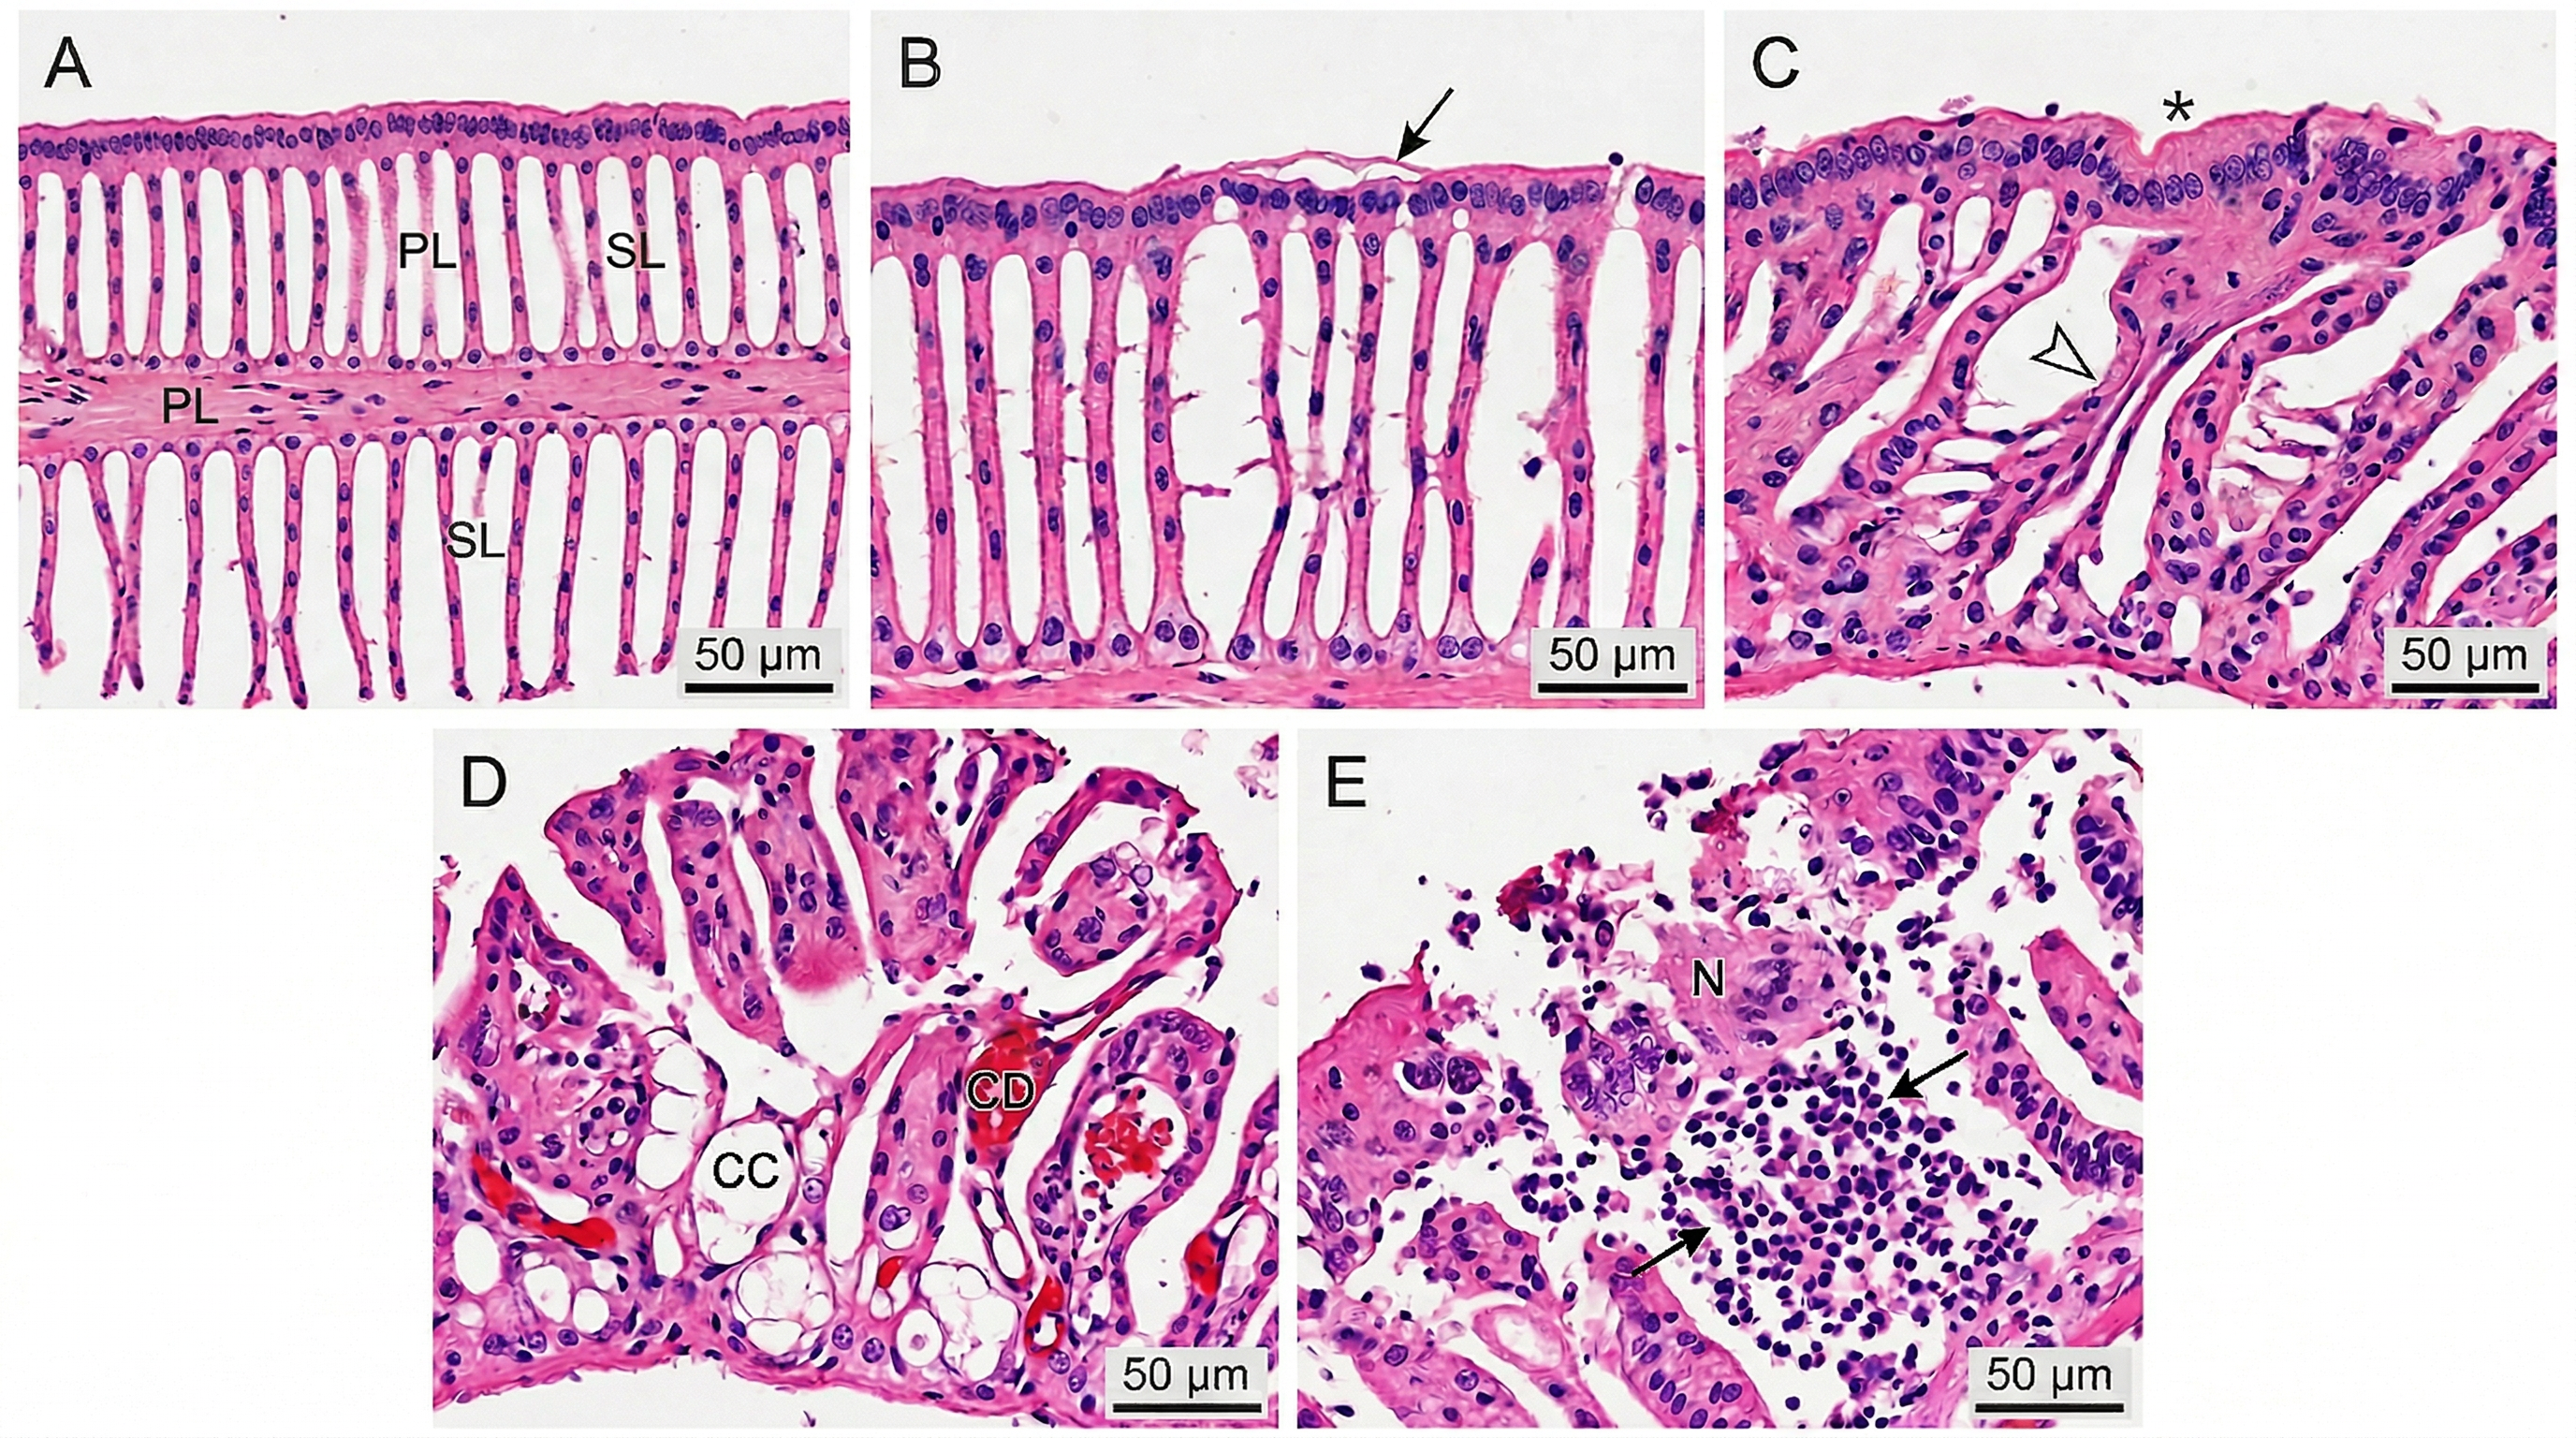
****

****Fig. 1** Representative photomicrographs of H&E‑stained gill sections from bighead carp exposed to SDBS for 21 days (400×magnification)**

Note: (A) Control group showing normal gill architecture with intact primary lamellae (PL) and secondary lamellae (SL). (B) Low concentration group (0.47 mg/L) showing mild epithelial lifting (arrow). (C) Medium concentration group (0.95 mg/L) showing moderate lamellar fusion (arrowhead) and epithelial hyperplasia (asterisk). (D) High concentration group (1.89 mg/L) showing severe lamellar fusion, chloride cell degeneration (CC), and circulatory disturbance (CD). (E) High concentration group (1.89 mg/L) showing epithelial necrosis (N) and inflammatory cell infiltration (arrow). Scale bars = 50 μm.

****
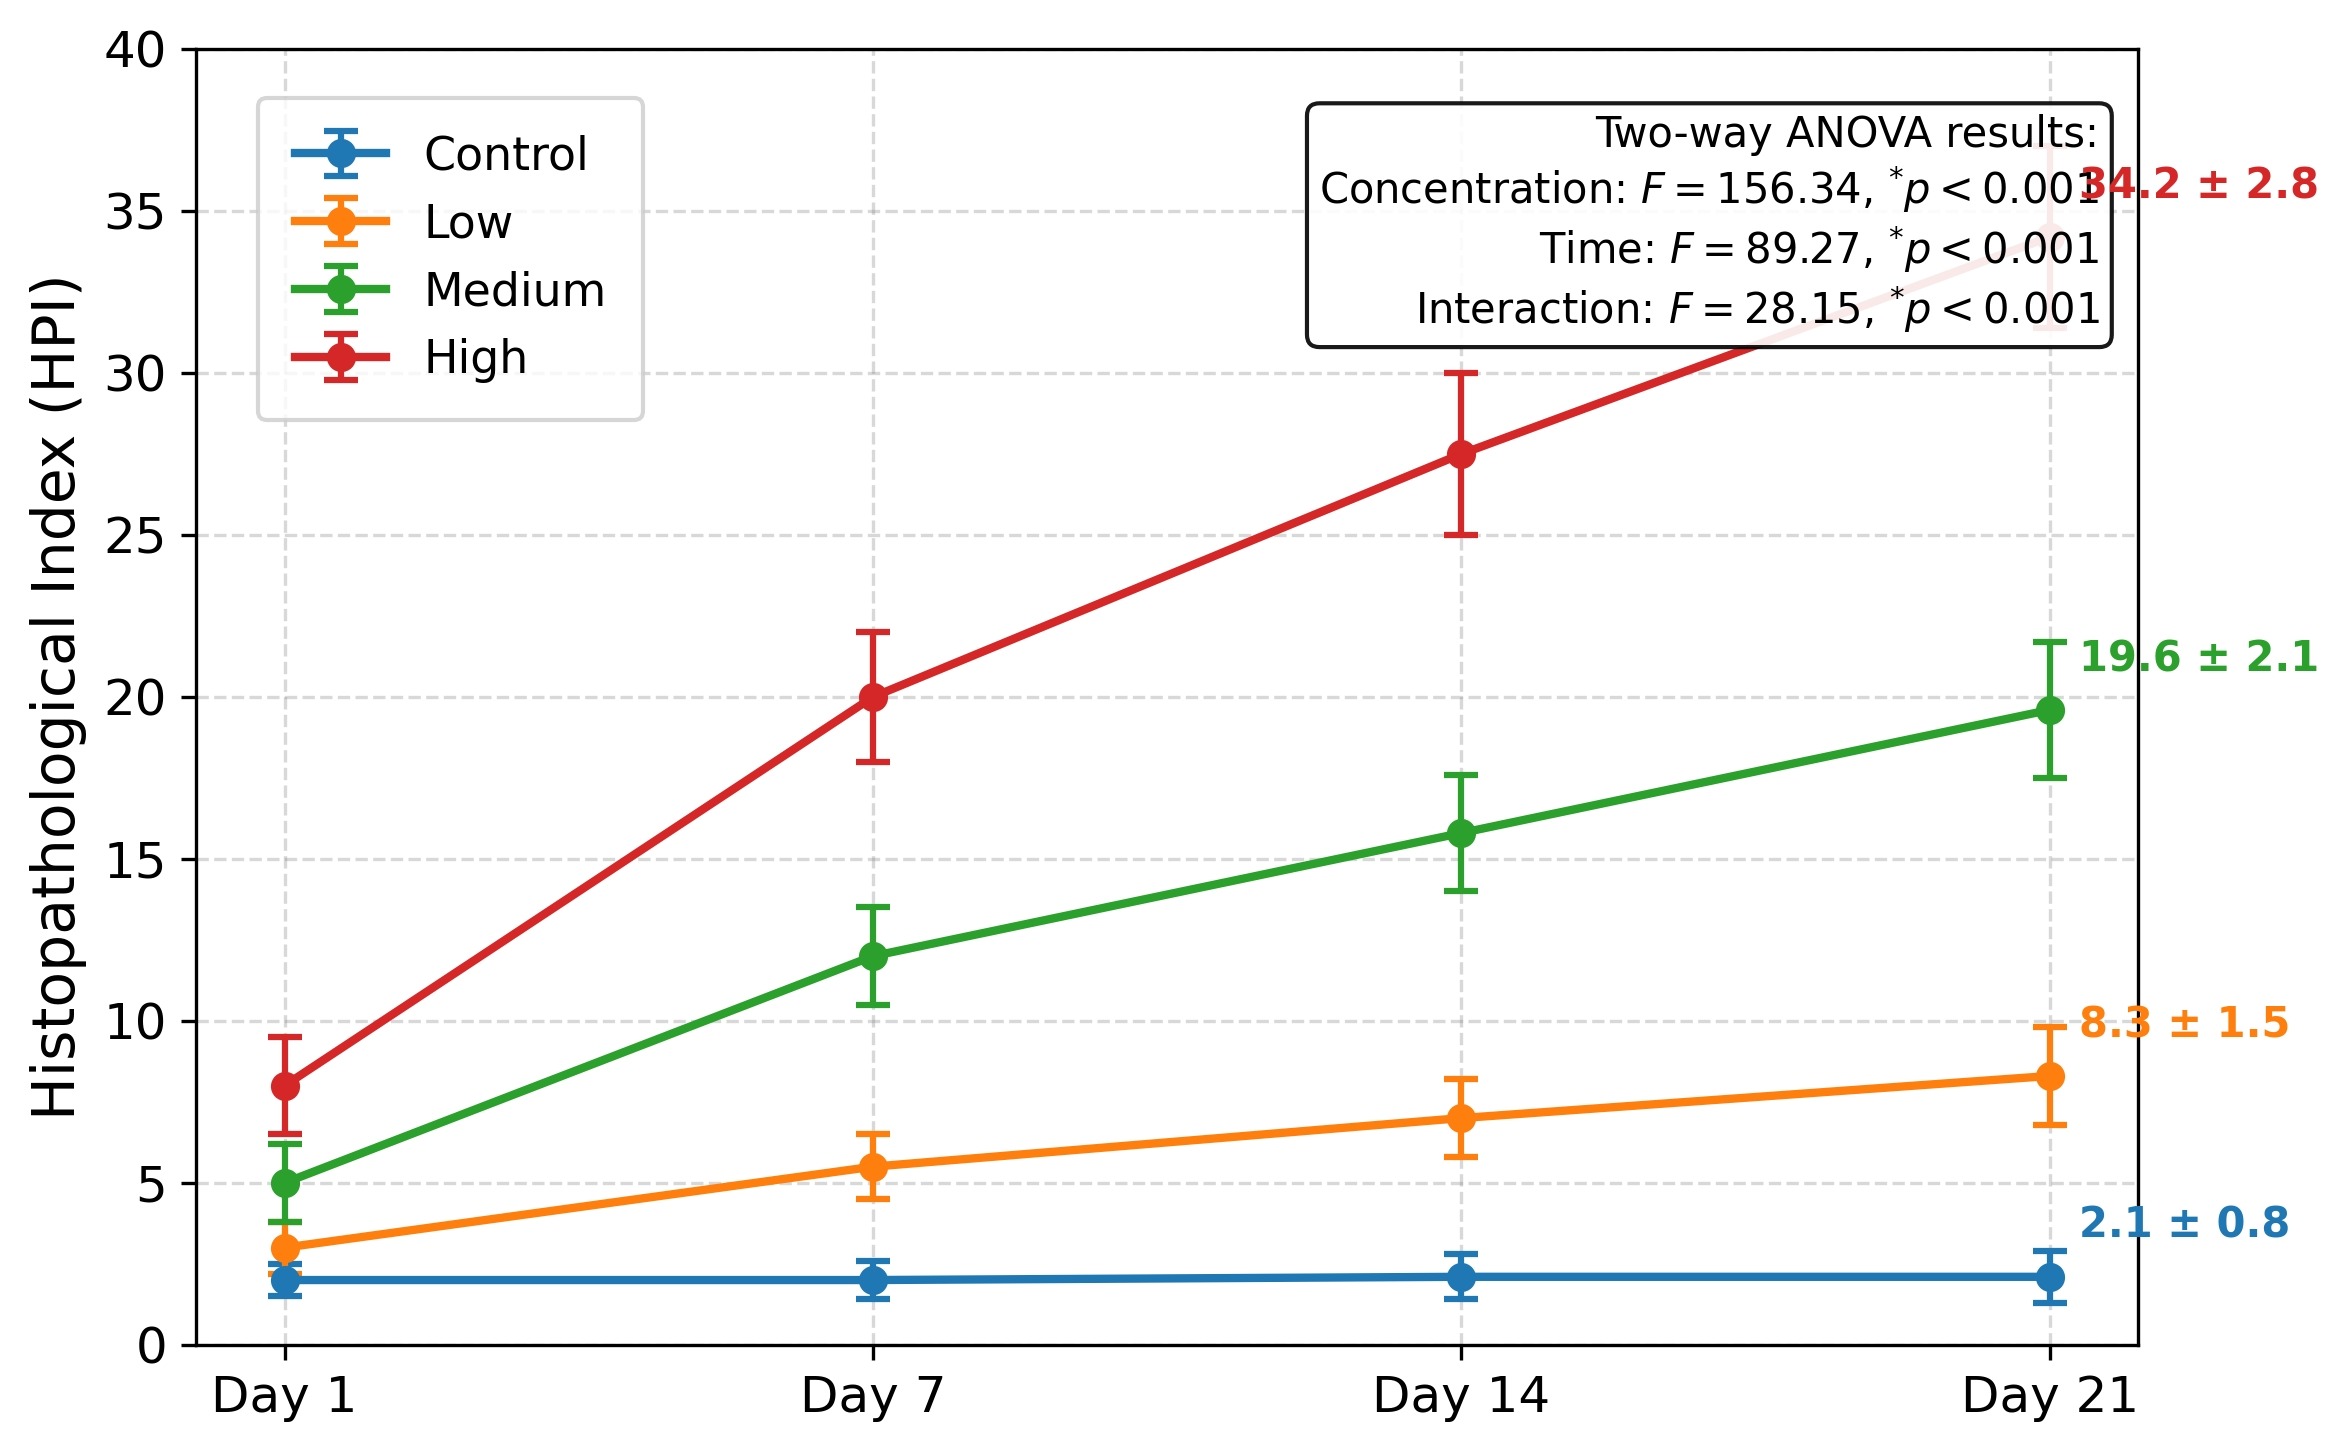
**Fig. 2 Concentration- and time-dependent changes in the histopathological index (HPI)**

Semi-quantitative histopathological scoring revealed a progressive increase in HPI across all treatment groups over time, with higher concentrations associated with significantly greater pathological severity. Two-way ANOVA demonstrated significant main effects of concentration (F = 156.34, ∗*p*<0.001), time (F = 89.27, ∗*p*<0.001), and their interaction (F = 28.15, ∗*p*<0.001). At day 21, HPI values (mean ± SD) for control, low, medium, and high groups were 2.1± 0.8, 8.3 ± 1.5, 19.6 ± 2.1, and 34.2 ± 2.8, respectively. Data are presented as mean ± SD.


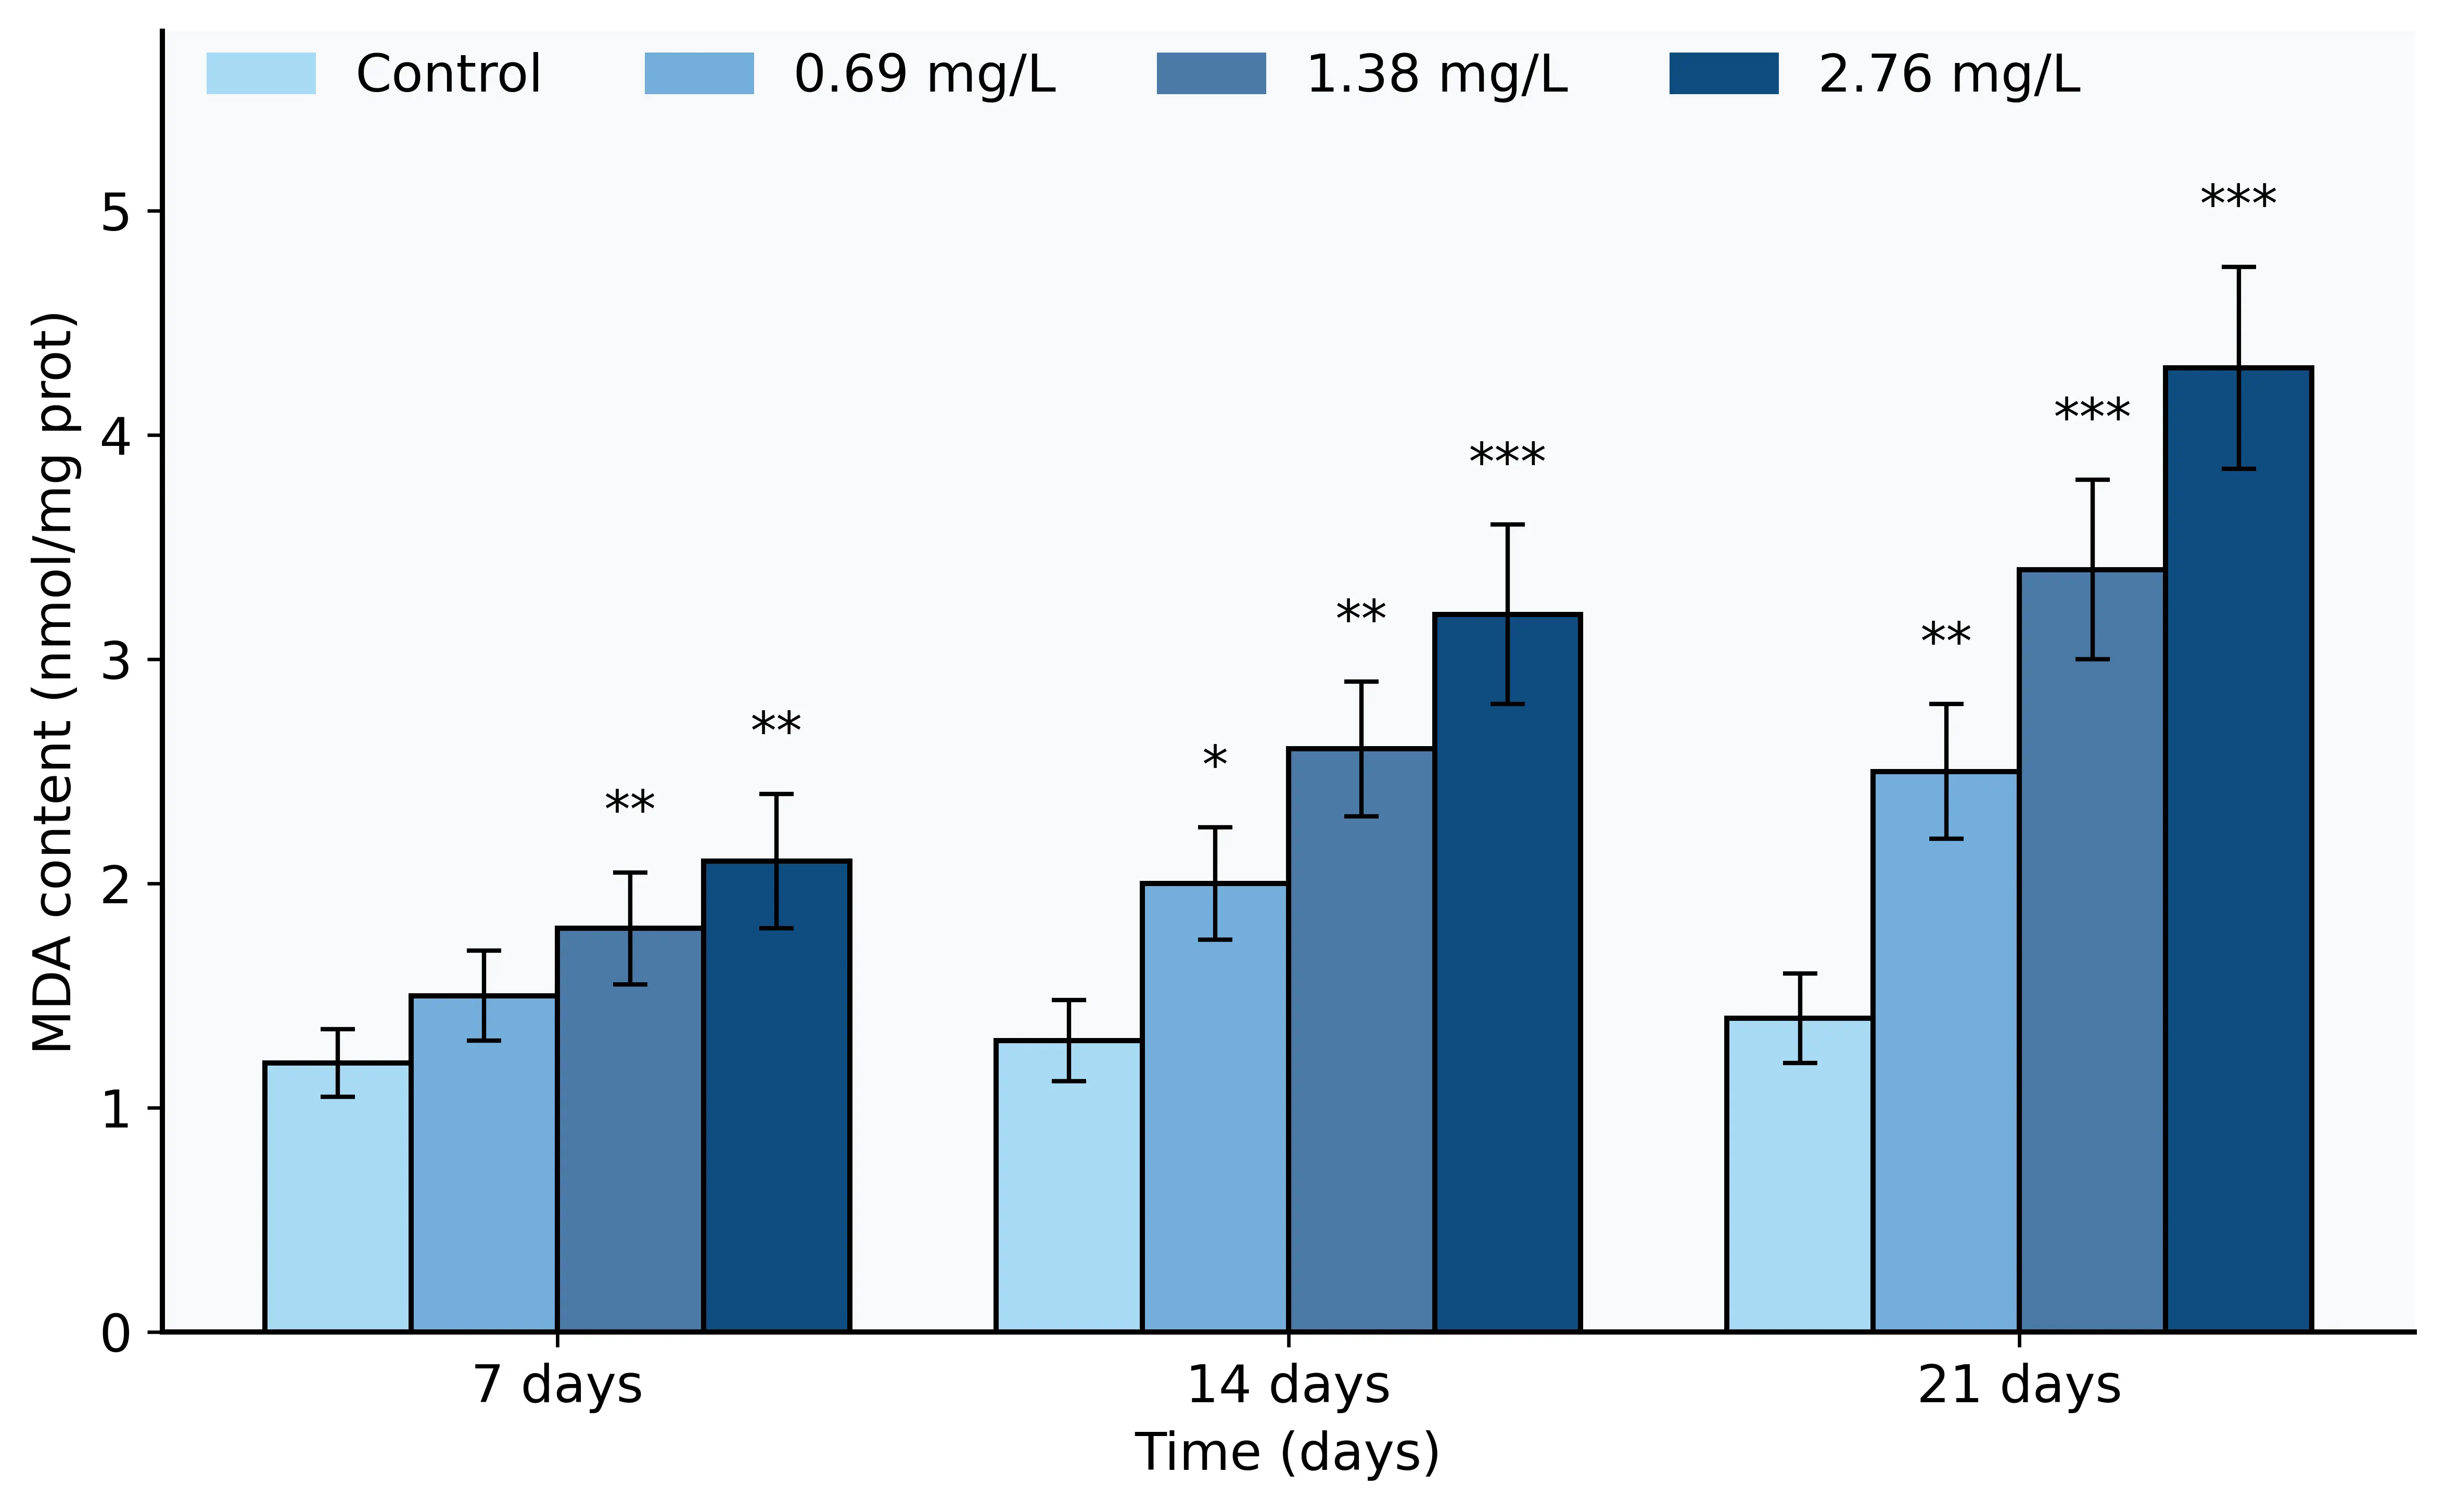


**Fig. 3 Malondialdehyde (MDA) content in gill tissue of bighead carp exposed to different SDBS concentrations for 7, 14, and 21 days**

Data are presented as mean ± SD (n = 15). **p* < 0.01, ***p* < 0.001 compared to control (two‑way ANOVA with Tukey’s HSD test).


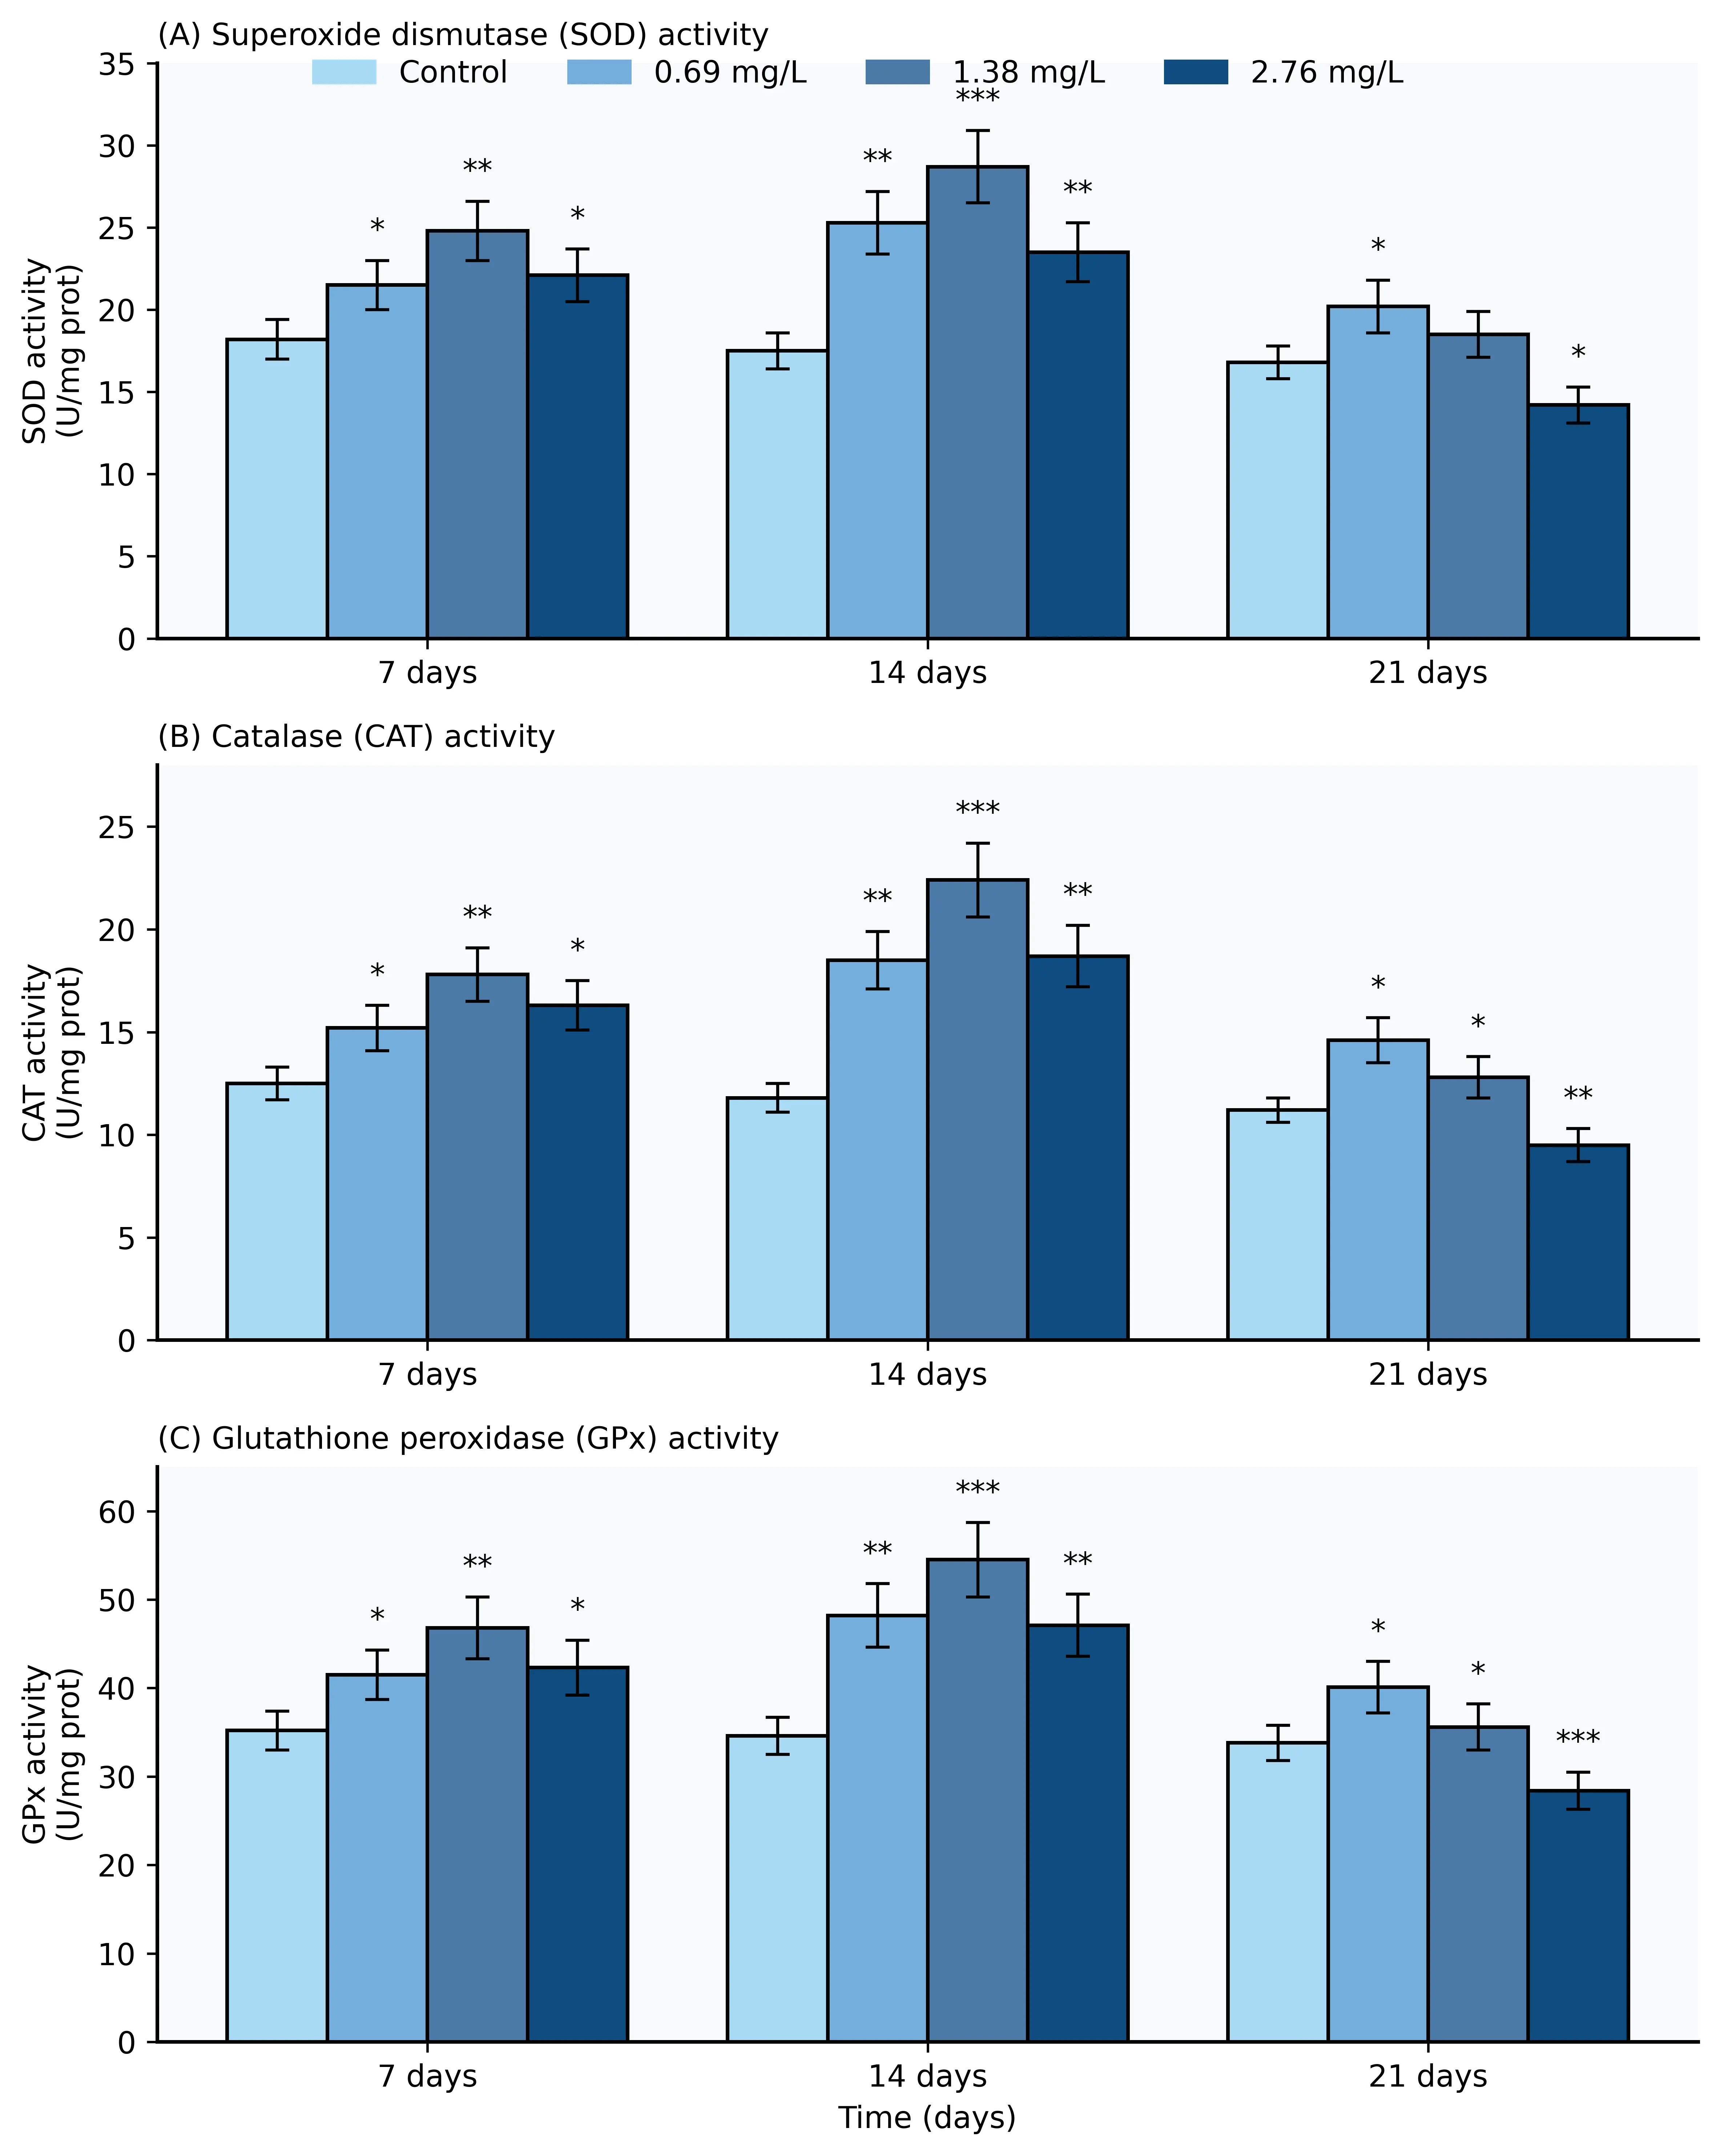


**Fig. 4 Antioxidant enzyme activities in gill tissue of bighead carp exposed to different SDBS concentrations for 7, 14, and 21 days**

1. Superoxide dismutase (SOD) activity. (B) Catalase (CAT) activity. (C) Glutathione peroxidase (GPx) activity. Data are presented as mean ± SD (n = 15). *p* < 0.05, **p* < 0.01, ***p* < 0.001 compared to control (two‑way ANOVA with Tukey’s HSD test).


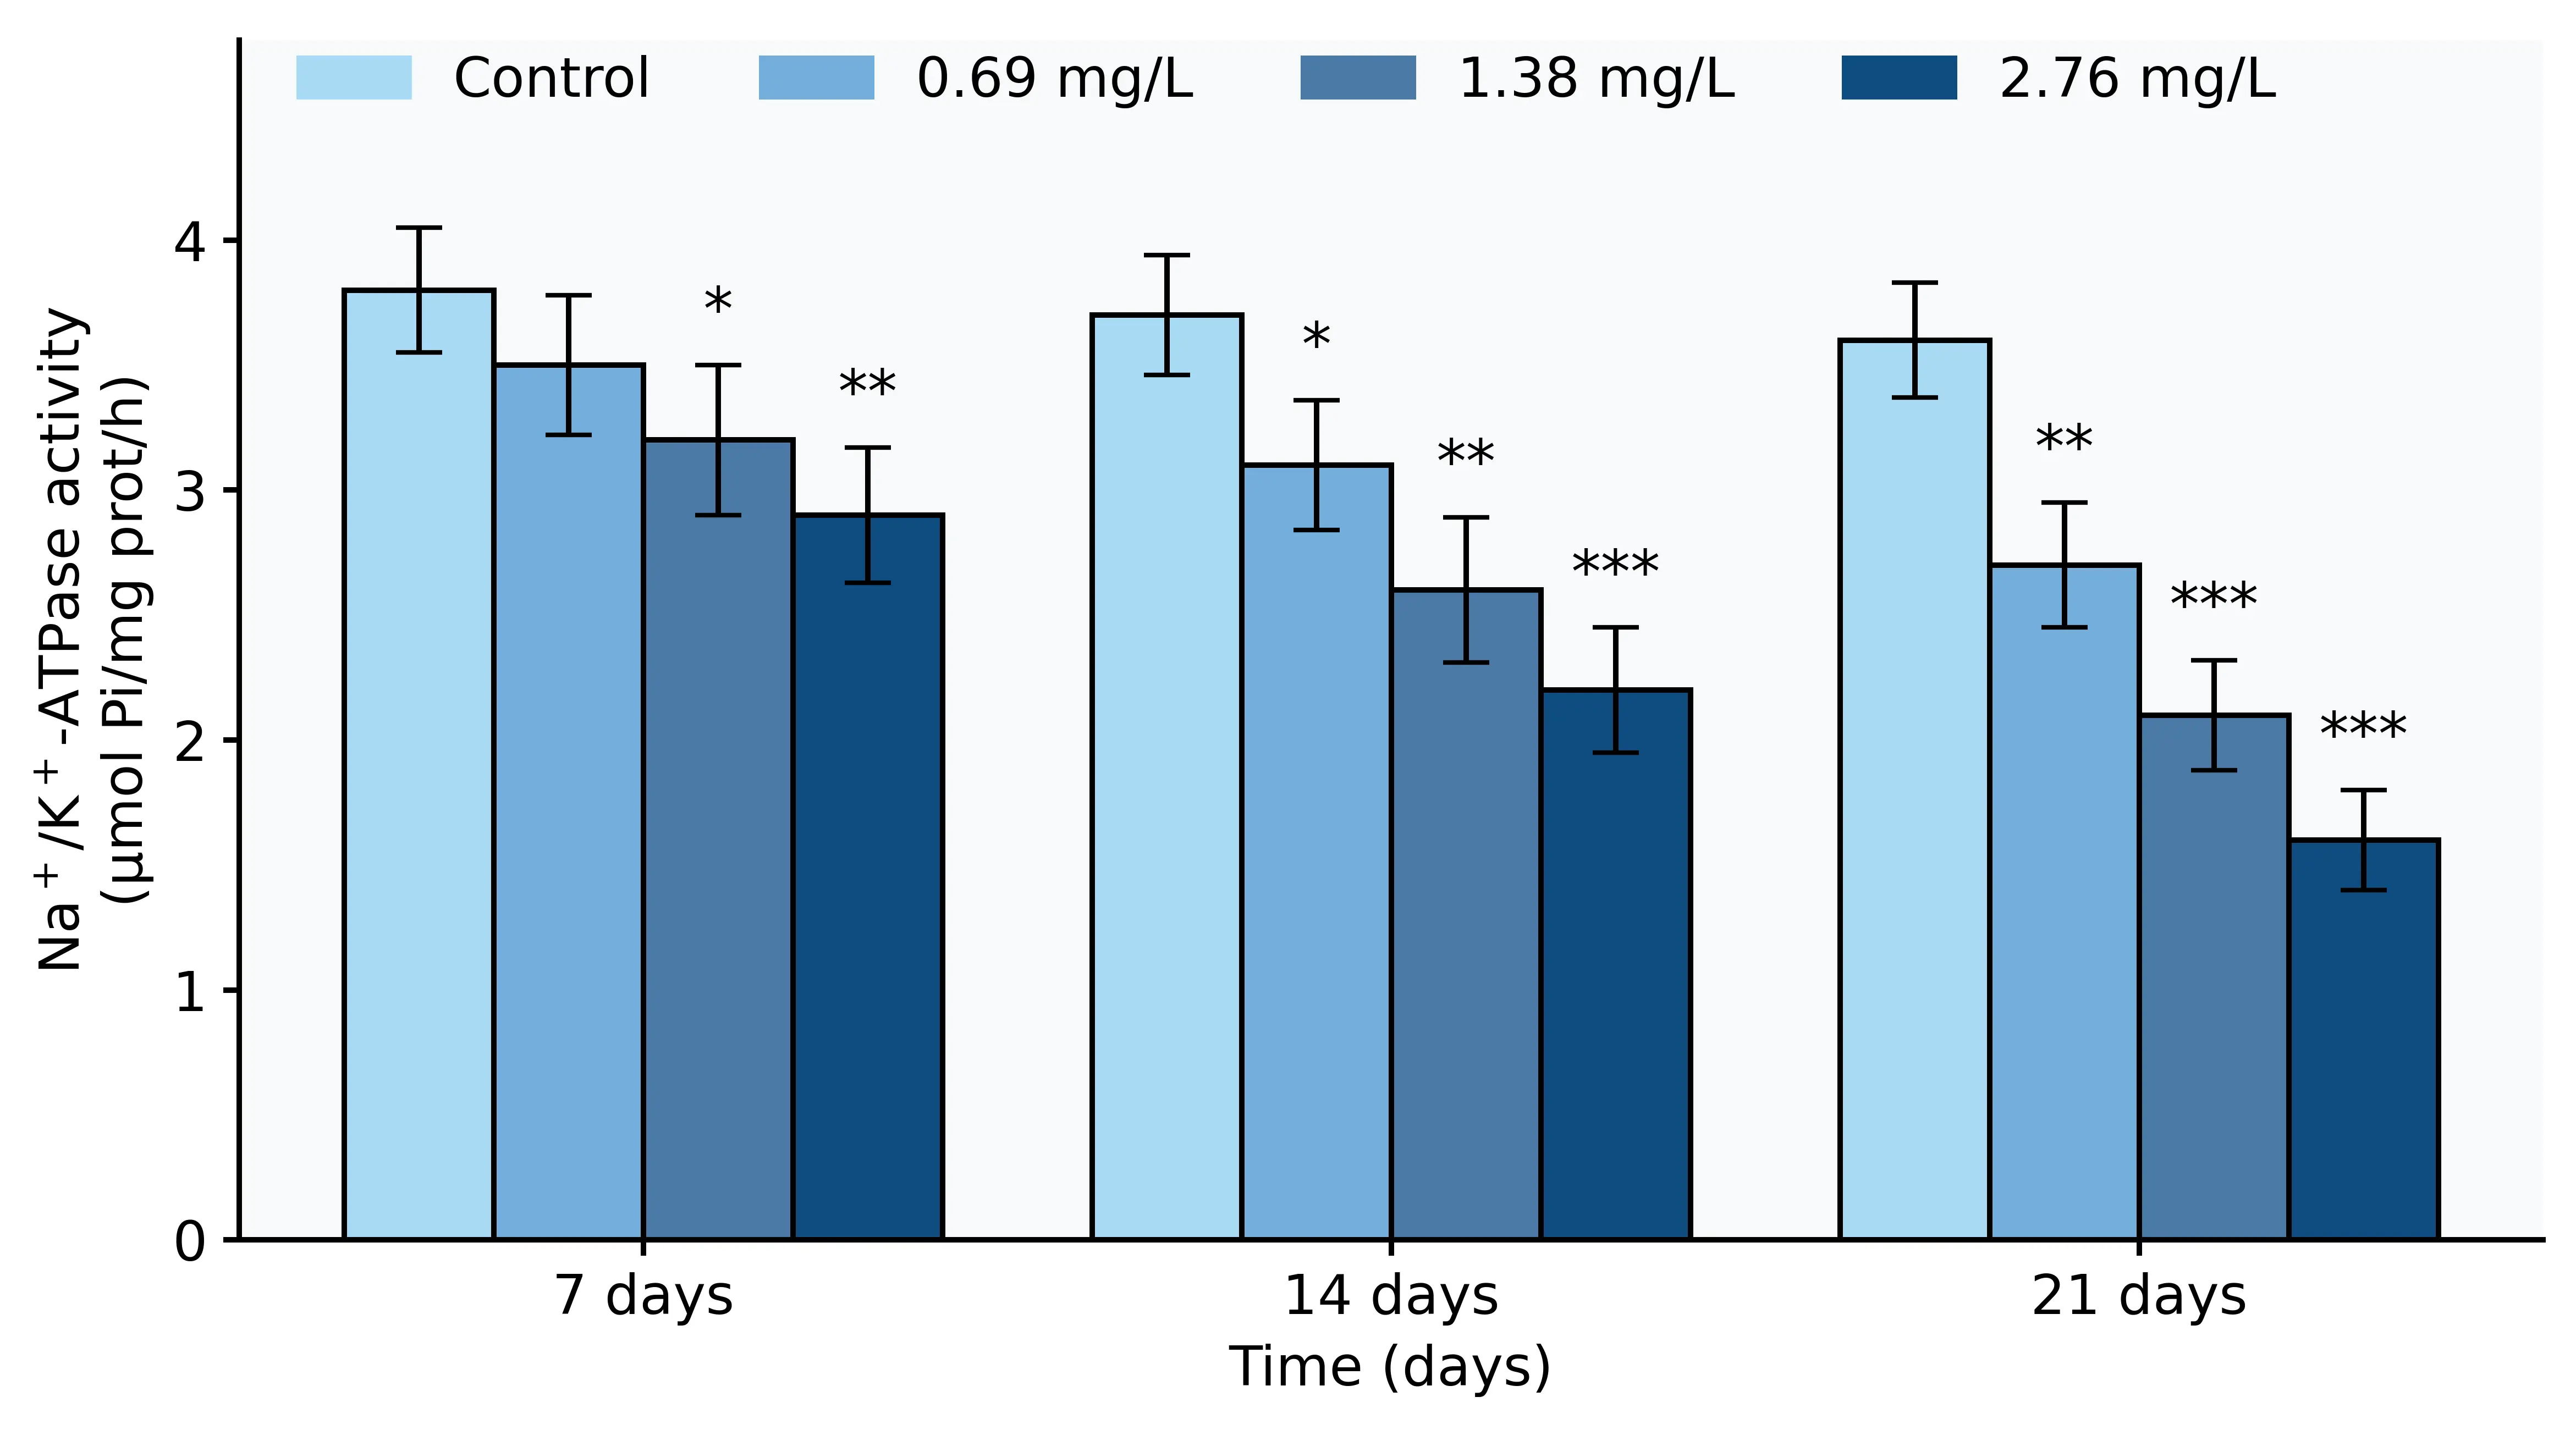


**Fig. 5 Na⁺/K⁺‑ATPase activity in gill tissue of bighead carp exposed to different SDBS concentrations for 7, 14, and 21 days**

Data are presented as mean ± SD (n = 15). *p* < 0.05, **p* < 0.01, ***p* < 0.001 compared to control (two‑way ANOVA with Tukey’s HSD test).

##
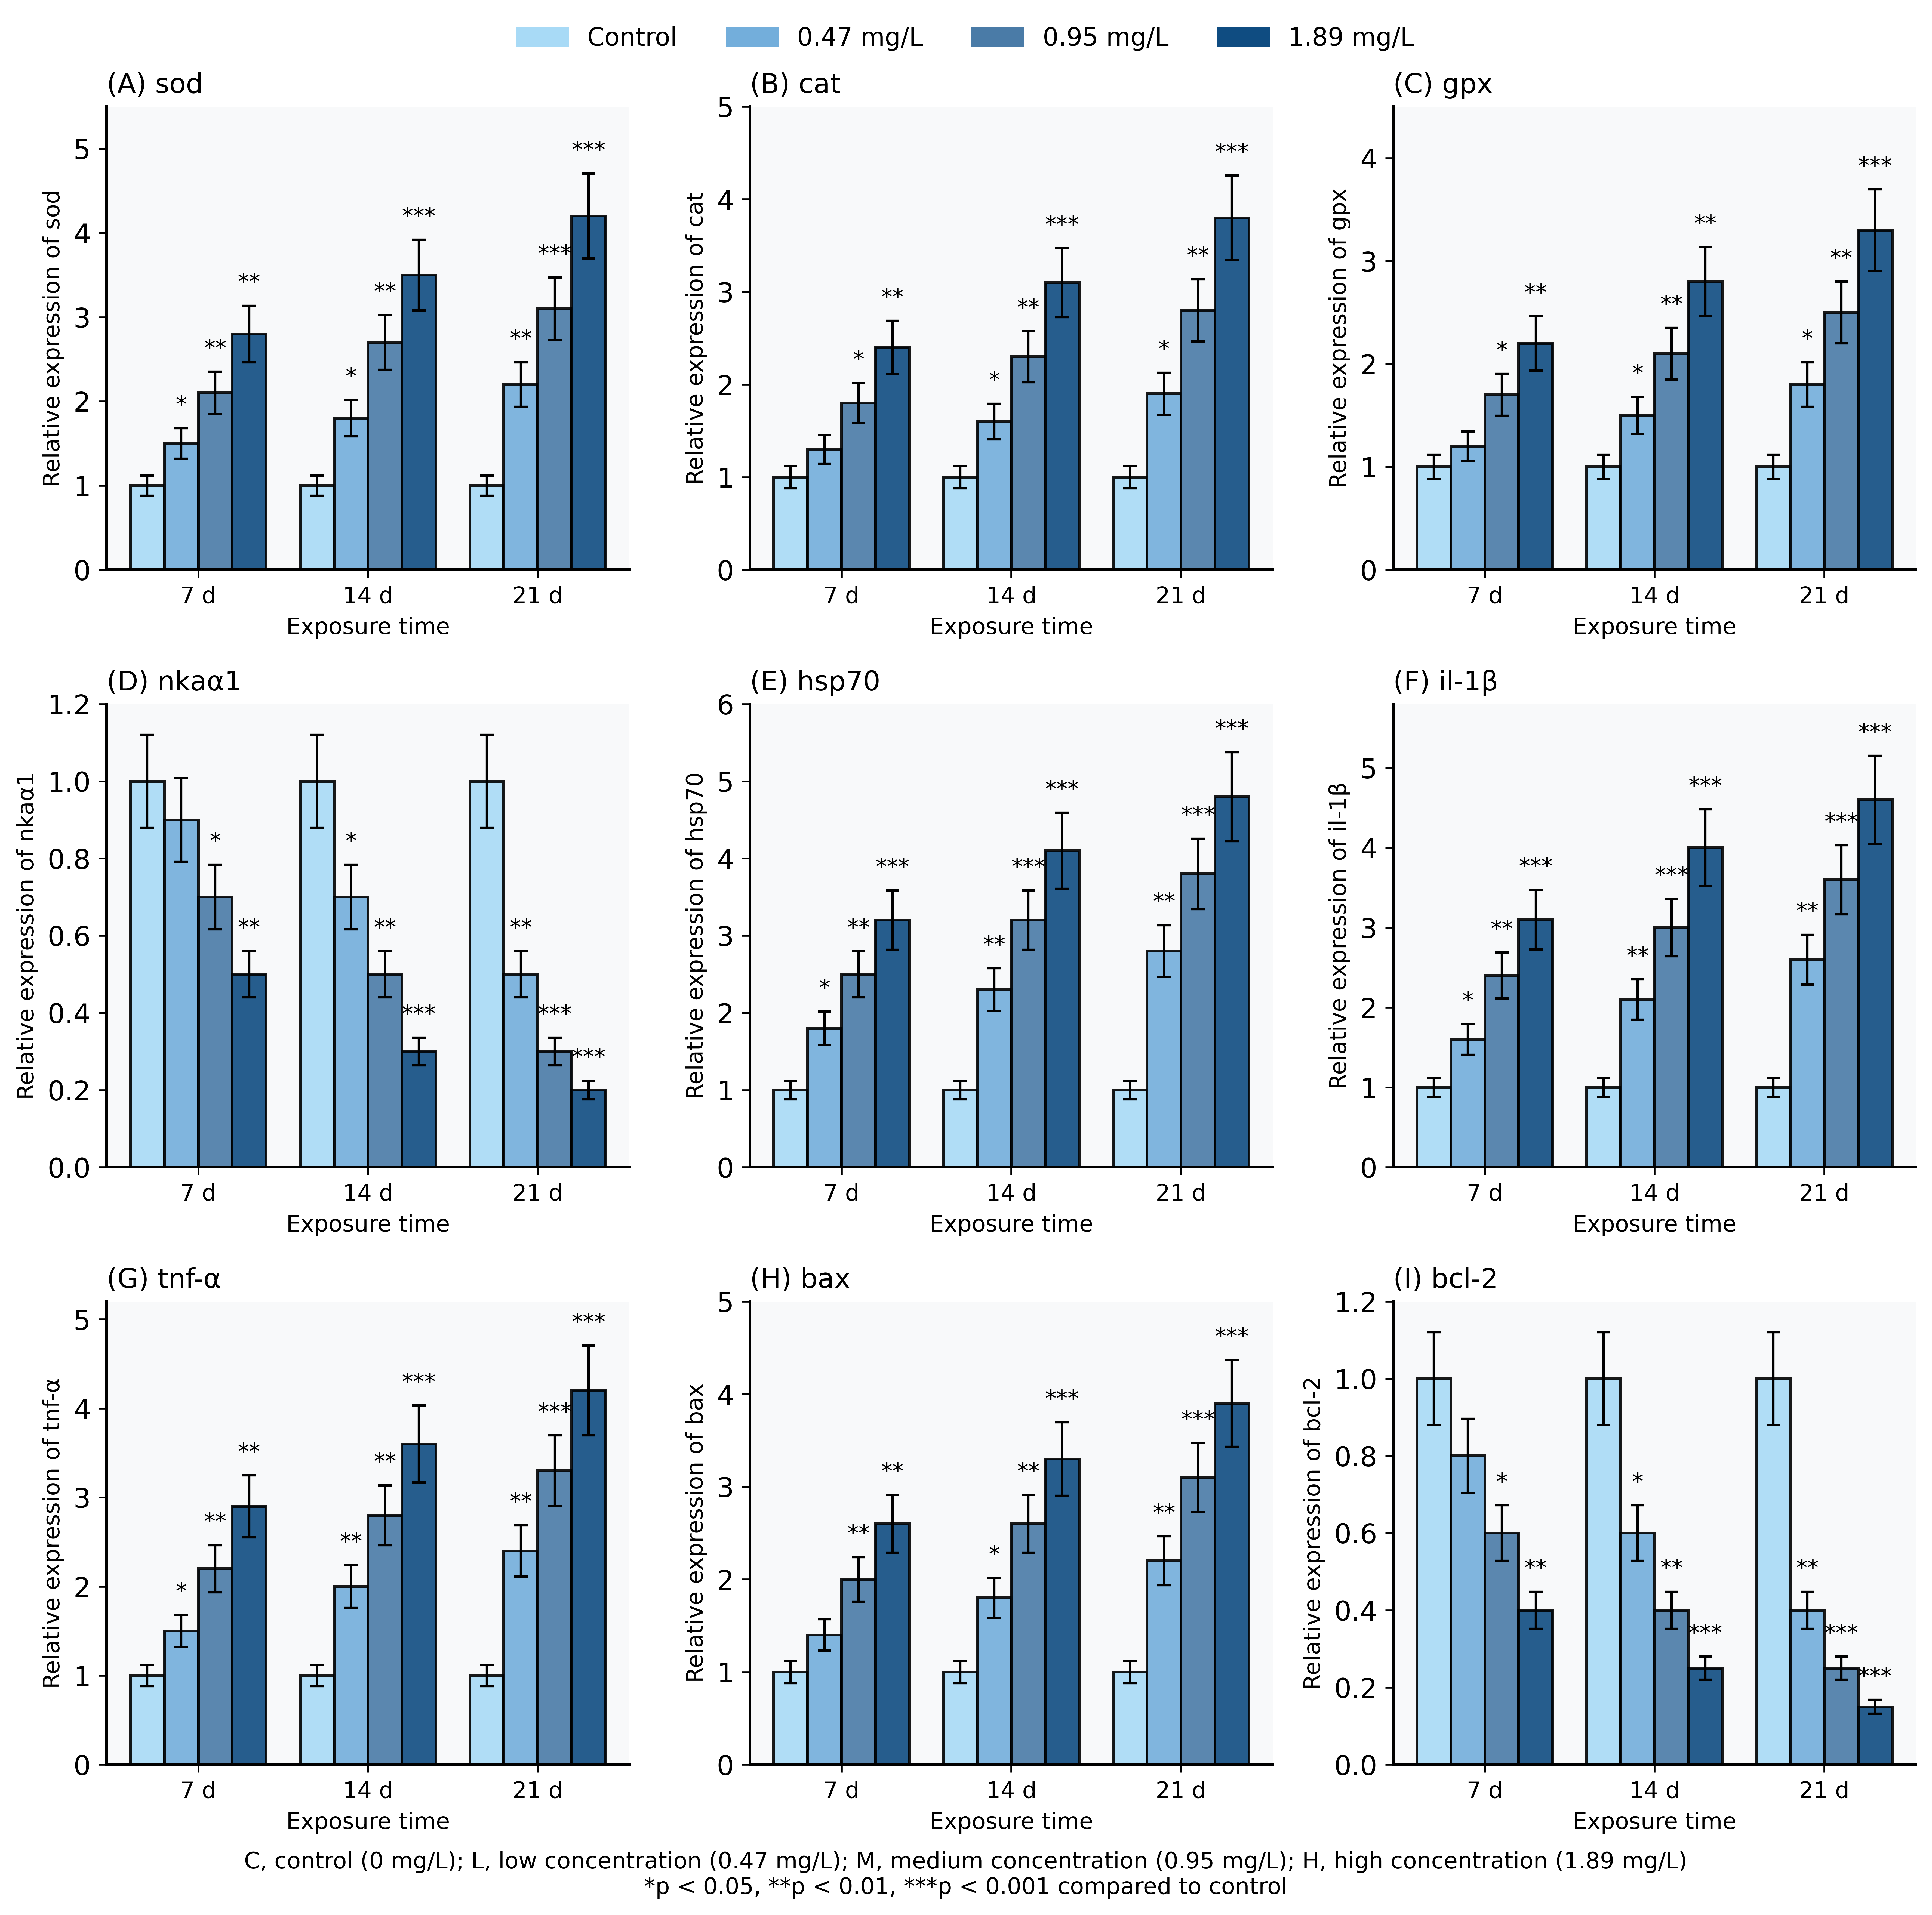


**Fig. 6 Relative expression levels of target genes in gill tissue of bighead carp exposed to SDBS for 7, 14, and 21 days**

Expression of (A) sod, (B) cat, (C) gpx, (D) nkaα1, (E) hsp70, (F) il-1β, (G) tnf-α, (H) bax, (I) bcl-2. Data are presented as mean ± SD (n = 15 per treatment per time point). *p < 0.05, **p < 0.01, ***p < 0.001 compared to control (two-way ANOVA with Tukey's HSD test). C, control (0 mg/L); L, low concentration (0.47 mg/L); M, medium concentration (0.95 mg/L); H, high concentration (1.89 mg/L).

**
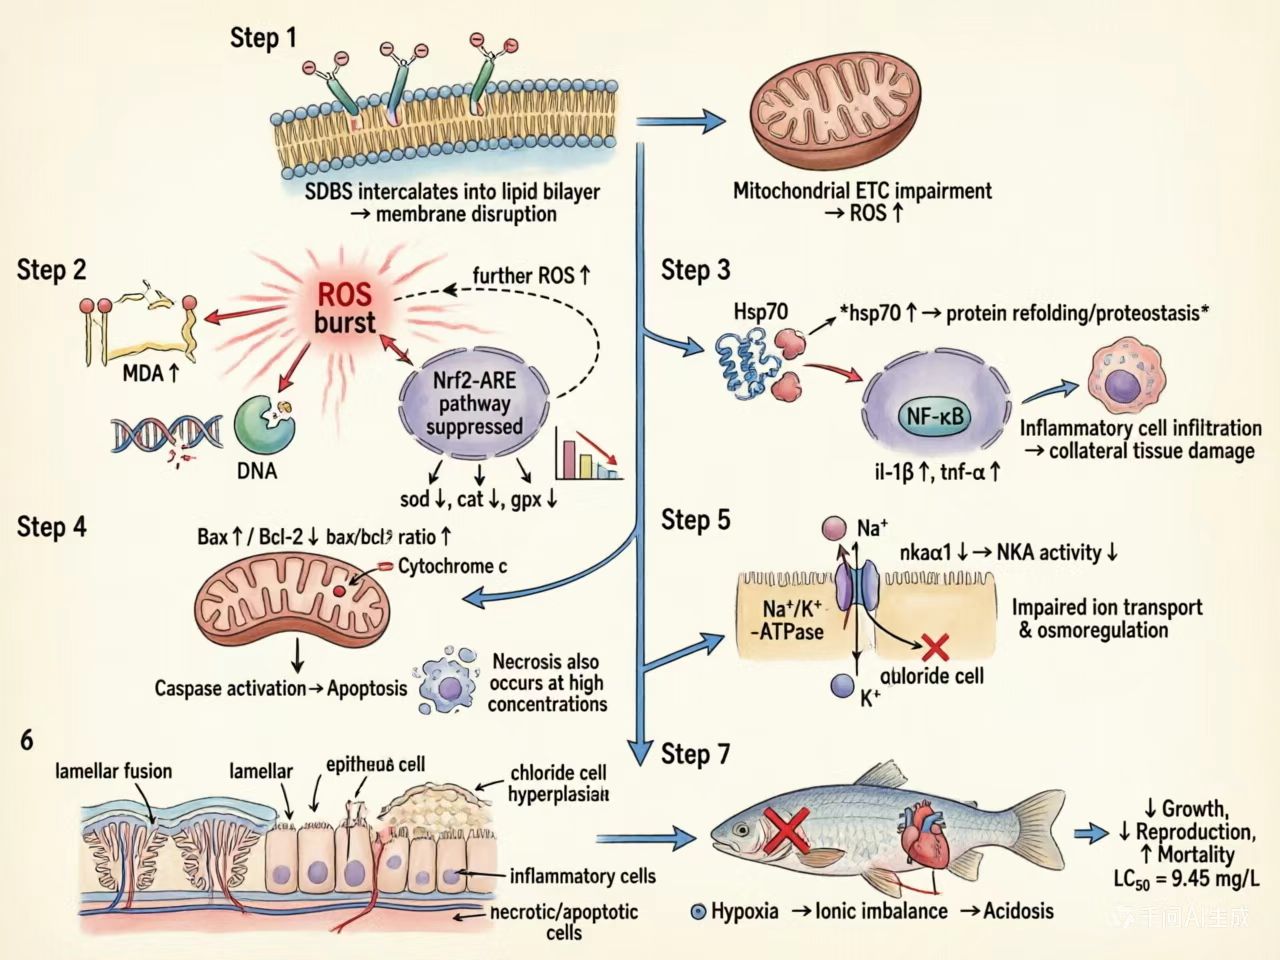
Fig. 7 Integrated molecular-to-organismal model of SDBS-induced gill toxicity**

**in bighead carp**

Integrated model of SDBS-induced gill toxicity in bighead carp. SDBS disrupts membrane integrity and mitochondrial function, causing ROS overproduction (Step 1). ROS suppress Nrf2-ARE and antioxidant enzymes, while inducing HSP70 and NF-κB-driven inflammation (Steps 2–3). Oxidative stress and TNF-α shift Bax/Bcl-2 ratio, triggering apoptosis (Step 4). SDBS also downregulates NKAα1 and reduces Na⁺/K⁺-ATPase activity, impairing ion transport (Step 5). These events lead to histopathological lesions (Step 6) and ultimately organ dysfunction, reduced fitness, and mortality (Step 7). Arrows indicate causal links; dashed arrows denote feedback or indirect effects.
